# Supplementary material
Source: publisher figshare collection journal article supplement (https://karger.figshare.com/ndownloader/files/22878725)
Supplement: Supplementary file 1 [file 22878725]

**Online supplementary material.** Postoperative outcomes in patients with complications

|  | **Patients** (n=18) |
| --- | --- |
| **Minor complications (I-IIIa)** |  |
| Bleeding / Hematoma | 3 (16%) |
| SSI - superficial | 1 (6%) |
| SSI – organ space | 2 (12%) |
| Ileus | 4 (24%) |
| Urinary retention | 2 (12%) |
| Diarrhea | 2 (12%) |
| Pneumonia | 1 (6%) |
| Acute renal failure | 1 (6%) |
| **Major complications (IIIb-IV)** |  |
| SSI – organ space | 1 (6%) |
| **Mortality** | 0 (0%) |
| **CCI** (mean, SD) | 21.4 (8.2) |
| **Readmission** | 4 (22%) |
| **Length of stay** (days) (mean, SD) | 8.8 (6.2) |
| Complications according to Clavien classification  SSI : surgical site infection  CCI: Comprehensive Complication Index  SD: standard deviation | |
